# Supplementary material for: Längsschnittliche psychometrische Analysen des Fragebogens zur Beziehungszufriedenheit – Kurzform (FBZ-K)
Source: Atypon-hosted journal article supplement (doi:10.1026/0012-1924/a000312), 2023-01-16
Supplement: 0012-1924_a000312_esm2a.pdf [file 0012-1924_a000312_esm2a.pdf]

**ESM Tabelle E2a.** FBZ-K: Item Mittelwerte (*M*), Standardabweichungen (*SD*), interne Konsistenz ( $\alpha$ ), Trennschärpen ( $r_{it}$ ), Item-Interkorrelationen und Zufriedenheitsklassifikationen für KITA-Studie und ZF-Studie Prä bis FU10 (Mütter)

| Item                    | KITA-Studie<br><i>N</i> = 417 |           |          | ZF 1 Prä<br><i>N</i> = 233 |           |          | ZF 1 FU1<br><i>N</i> = 234 |           |          | ZF 1 FU2<br><i>N</i> = 232 |           |          | ZF 1 FU3<br><i>N</i> = 223 |           |          | ZF 1 FU4<br><i>N</i> = 205 |           |          | ZF 1 FU10<br><i>N</i> = 213 |           |          |
|-------------------------|-------------------------------|-----------|----------|----------------------------|-----------|----------|----------------------------|-----------|----------|----------------------------|-----------|----------|----------------------------|-----------|----------|----------------------------|-----------|----------|-----------------------------|-----------|----------|
|                         | <i>M</i>                      | <i>SD</i> | $r_{it}$ | <i>M</i>                   | <i>SD</i> | $r_{it}$ | <i>M</i>                   | <i>SD</i> | $r_{it}$ | <i>M</i>                   | <i>SD</i> | $r_{it}$ | <i>M</i>                   | <i>SD</i> | $r_{it}$ | <i>M</i>                   | <i>SD</i> | $r_{it}$ | <i>M</i>                    | <i>SD</i> | $r_{it}$ |
| 1                       | 3.6                           | 0.9       | .43      | 3.7                        | 0.7       | .31      | 3.7                        | 0.8       | .40      | 3.7                        | 0.8       | .40      | 3.7                        | 0.8       | .47      | 3.7                        | 0.8       | .56      | 3.5                         | 1.0       | .46      |
| 2                       | 3.8                           | 0.9       | .56      | 3.7                        | 0.9       | .56      | 3.7                        | 0.8       | .65      | 3.7                        | 0.8       | .59      | 3.7                        | 0.8       | .57      | 3.7                        | 0.9       | .71      | 3.6                         | 1.0       | .52      |
| 3                       | 3.5                           | 1.1       | .57      | 3.4                        | 1.0       | .46      | 3.4                        | 1.0       | .54      | 3.5                        | 0.9       | .55      | 3.5                        | 1.0       | .60      | 3.4                        | 1.0       | .61      | 3.2                         | 1.2       | .44      |
| 4                       | 3.1                           | 1.3       | .71      | 3.0                        | 1.2       | .70      | 3.3                        | 1.1       | .70      | 3.2                        | 1.2       | .72      | 3.2                        | 1.2       | .73      | 3.2                        | 1.2       | .75      | 2.9                         | 1.3       | .67      |
| 5                       | 2.7                           | 1.2       | .64      | 2.7                        | 1.2       | .63      | 2.9                        | 1.1       | .59      | 2.9                        | 1.1       | .71      | 2.9                        | 1.2       | .68      | 2.9                        | 1.2       | .74      | 2.2                         | 1.3       | .59      |
| 6                       | 2.7                           | 1.5       | .62      | 2.7                        | 1.4       | .54      | 2.9                        | 1.3       | .64      | 2.8                        | 1.2       | .61      | 2.8                        | 1.4       | .59      | 2.8                        | 1.4       | .68      | 2.1                         | 1.4       | .49      |
| 7                       | 3.4                           | 1.3       | .61      | 3.6                        | 1.1       | .67      | 3.6                        | 1.0       | .73      | 3.5                        | 1.1       | .68      | 3.5                        | 1.1       | .60      | 3.6                        | 1.1       | .74      | 3.1                         | 1.2       | .68      |
| Summenwert/SD/M         | 22.8                          | 5.8       | .59      | 22.8                       | 5.3       | .55      | 23.5                       | 5.2       | .61      | 23.2                       | 5.2       | .61      | 23.3                       | 5.5       | .61      | 23.3                       | 5.9       | .68      | 20.5                        | 5.9       | .55      |
| Cronbach's $\alpha$     | .84                           |           |          | .81                        |           |          | .84                        |           |          | .85                        |           |          | .84                        |           |          | .89                        |           |          | .81                         |           |          |
| Item Interkorrelationen | .42                           |           |          | .38                        |           |          | .44                        |           |          | .44                        |           |          | .44                        |           |          | .53                        |           |          | .38                         |           |          |
| Niedrige Zufriedenheit  | 17 %                          |           |          | 15 %                       |           |          | 10 %                       |           |          | 13 %                       |           |          | 15 %                       |           |          | 14 %                       |           |          | 26 %                        |           |          |
| Mittlere Zufriedenheit  | 27 %                          |           |          | 28 %                       |           |          | 31 %                       |           |          | 30 %                       |           |          | 23 %                       |           |          | 22 %                       |           |          | 33 %                        |           |          |
| Hohe Zufriedenheit      | 56 %                          |           |          | 57 %                       |           |          | 59 %                       |           |          | 57 %                       |           |          | 62 %                       |           |          | 64 %                       |           |          | 41 %                        |           |          |
