# Supplementary material for: Längsschnittliche psychometrische Analysen des Fragebogens zur Beziehungszufriedenheit – Kurzform (FBZ-K)
Source: Atypon-hosted journal article supplement (doi:10.1026/0012-1924/a000312), 2023-01-16
Supplement: 0012-1924_a000312_esm2b.pdf [file 0012-1924_a000312_esm2b.pdf]

**ESM Tabelle E2b.** FBZ-K: Item Mittelwerte (*M*), Standardabweichungen (*SD*), interne Konsistenz ( $\alpha$ ), Trennschärpen ( $r_{it}$ ), Item-Interkorrelationen und Zufriedenheitsklassifikationen für KITA-Studie und ZF-Studie Prä bis FU10 (Väter)

| Item                             | ZF 1 Prä<br>N = 201 |           |          | ZF 1 FU1<br>N = 201 |           |          | ZF 1 FU2<br>N = 197 |           |          | ZF 1 FU3<br>N = 190 |           |          | ZF 1 FU4<br>N = 175 |           |          | ZF 1 FU10<br>N = 182 |           |          |
|----------------------------------|---------------------|-----------|----------|---------------------|-----------|----------|---------------------|-----------|----------|---------------------|-----------|----------|---------------------|-----------|----------|----------------------|-----------|----------|
|                                  | <i>M</i>            | <i>SD</i> | $r_{it}$ | <i>M</i>             | <i>SD</i> | $r_{it}$ |
| 1                                | 3.7                 | 0.8       | .39      | 3.8                 | 0.7       | .32      | 3,8                 | 0,8       | .47      | 3.8                 | 0.8       | .51      | 3.7                 | 0.7       | .53      | 3.7                  | 0.8       | .48      |
| 2                                | 3.7                 | 0.8       | .59      | 3.7                 | 0.8       | .64      | 3,7                 | 0,9       | .61      | 3.8                 | 0.8       | .56      | 3.7                 | 0.8       | .70      | 3.8                  | 0.8       | .62      |
| 3                                | 3.5                 | 1.0       | .52      | 3.5                 | 0.8       | .59      | 3,4                 | 0,9       | .64      | 3.5                 | 0.9       | .59      | 3.4                 | 0.9       | .57      | 3.5                  | 0.9       | .66      |
| 4                                | 3.0                 | 1.1       | .62      | 3.2                 | 1.1       | .69      | 3,2                 | 1,1       | .69      | 3.3                 | 1.2       | .73      | 3.1                 | 1.2       | .75      | 3.3                  | 1.2       | .70      |
| 5                                | 3.0                 | 1.1       | .64      | 3.0                 | 1.1       | .64      | 3,0                 | 1,0       | .73      | 3.1                 | 1.2       | .73      | 3.0                 | 1.2       | .76      | 3.1                  | 1.3       | .75      |
| 6                                | 2.8                 | 1.3       | .57      | 2.9                 | 1.2       | .65      | 2,9                 | 1,3       | .69      | 2.9                 | 1.3       | .71      | 2.9                 | 1.2       | .71      | 2.8                  | 1.4       | .66      |
| 7                                | 3.6                 | 1.0       | .63      | 3.6                 | 1.0       | .60      | 3,6                 | 1,0       | .66      | 3.7                 | 1.0       | .63      | 3.6                 | 1.1       | .74      | 3.7                  | 1.2       | .68      |
| Summenwert/ <i>SD</i> / <i>M</i> | 23.3                | 5.0       | .57      | 23.7                | 4.8       | .59      | 23.7                | 5.2       | .64      | 23.9                | 5.3       | .64      | 23.4                | 5.5       | .68      | 23.8                 | 5.8       | .65      |
| Cronbach's $\alpha$              | .82                 |           |          | .84                 |           |          | .87                 |           |          | .86                 |           |          | .88                 |           |          | .87                  |           |          |
| Item Interkorrelationen          | .40                 |           |          | .42                 |           |          | .48                 |           |          | .48                 |           |          | .52                 |           |          | .49                  |           |          |
| Niedrige Zufriedenheit           | 11 %                |           |          | 10 %                |           |          | 13 %                |           |          | 12 %                |           |          | 15 %                |           |          | 13 %                 |           |          |
| Mittlere Zufriedenheit           | 33 %                |           |          | 34 %                |           |          | 30 %                |           |          | 27 %                |           |          | 22 %                |           |          | 27 %                 |           |          |
| Hohe Zufriedenheit               | 56 %                |           |          | 56 %                |           |          | 57 %                |           |          | 61 %                |           |          | 63 %                |           |          | 60 %                 |           |          |
