# Supplementary material for: Längsschnittliche psychometrische Analysen des Fragebogens zur Beziehungszufriedenheit – Kurzform (FBZ-K)
Source: Atypon-hosted journal article supplement (doi:10.1026/0012-1924/a000312), 2023-01-16
Supplement: 0012-1924_a000312_esm3.pdf [file 0012-1924_a000312_esm3.pdf]

**ESM Tabelle E3.** FBZ-K: mittlere Trennschärfen ( $r_{it}$ ), Interne Konsistenzen ( $\alpha$ ) und Item-Interkorrelationen für Mütter und Väter für die Kita-Studie und für die ZF-Studie über die Messzeitpunkte Prä bis FU10.

| Zeitpunkt       | Mütter   |            |            |            | Väter    |            |            |            |
|-----------------|----------|------------|------------|------------|----------|------------|------------|------------|
|                 | <i>N</i> | $\alpha$   | $r_{it}$   | $r_{ij}$   | <i>N</i> | $\alpha$   | $r_{it}$   | $r_{ij}$   |
| Kita-Studie     | 417      | .84        | .59        | .42        |          |            |            |            |
| ZF Prä          | 233      | .81        | .55        | .38        | 201      | .82        | .57        | .40        |
| ZF FU1          | 234      | .84        | .61        | .44        | 200      | .84        | .59        | .42        |
| ZF FU2          | 232      | .85        | .61        | .44        | 197      | .86        | .64        | .48        |
| ZF FU3          | 223      | .84        | .61        | .44        | 190      | .86        | .65        | .48        |
| ZF FU4          | 205      | .89        | .68        | .53        | 175      | .88        | .68        | .52        |
| ZF FU10         | 214      | .81        | .55        | .38        | 181      | .86        | .65        | .49        |
| <b><i>M</i></b> |          | <b>.84</b> | <b>.60</b> | <b>.44</b> |          | <b>.85</b> | <b>.63</b> | <b>.47</b> |

Anmerkungen.  $r_{ij}$  = Item-Interkorrelationen; *M* = Mittelwert.
