# Supplementary material for: Längsschnittliche psychometrische Analysen des Fragebogens zur Beziehungszufriedenheit – Kurzform (FBZ-K)
Source: Atypon-hosted journal article supplement (doi:10.1026/0012-1924/a000312), 2023-01-16
Supplement: 0012-1924_a000312_esm4.pdf [file 0012-1924_a000312_esm4.pdf]

**ESM Tabelle E4.** FBZ-K: ZF1 Mittelwerte (*M*) und Standardabweichungen (*SD*) der Items über die Messzeitpunkte Prä, FU1, FU2, FU3, FU4 und FU10 für Mütter und Väter, Geschlechtervergleich mit t-Tests

| <b>Item</b>                | <b>Prä</b> |           | <b>FU1</b> |           | <b>FU2</b> |           | <b>FU3</b> |           | <b>FU4</b> |           | <b>FU10</b> |           |
|----------------------------|------------|-----------|------------|-----------|------------|-----------|------------|-----------|------------|-----------|-------------|-----------|
| <i>N</i> <sub>Mutter</sub> | 233        |           | 234        |           | 232        |           | 223        |           | 205        |           | 214         |           |
| <i>N</i> <sub>Vater</sub>  | 201        |           | 200        |           | 197        |           | 190        |           | 175        |           | 181         |           |
|                            | <i>M</i>   | <i>SD</i> | <i>M</i>    | <i>SD</i> |
| <b>Item 1</b>              |            |           |            |           |            |           |            |           |            |           |             |           |
| Mütter                     | 3.7        | 0.7       | 3.7        | 0.8       | 3.7        | 0.8       | 3.7        | 0.8       | 3.7        | 0.8       | 3.5         | 1.0       |
| Väter                      | 3.7        | 0.8       | 3.8        | 0.7       | 3.8        | 0.8       | 3.8        | 0.8       | 3.7        | 0.7       | 3.8         | 0.8       |
| <b>Item 2</b>              |            |           |            |           |            |           |            |           |            |           |             |           |
| Mütter                     | 3.7        | 0.9       | 3.7        | 0.8       | 3.7        | 0.8       | 3.7        | 0.8       | 3.7        | 0.9       | 3.6         | 1.0       |
| Väter                      | 3.7        | 0.8       | 3.7        | 0.8       | 3.7        | 0.9       | 3.8        | 0.8       | 3.7        | 0.9       | 3.8         | 0.7       |
| <b>Item 3</b>              |            |           |            |           |            |           |            |           |            |           |             |           |
| Mütter                     | 3.4        | 1.0       | 3.4        | 1.0       | 3.5        | 0.9       | 3.5        | 1.0       | 3.4        | 1.0       | 3.1         | 1.2       |
| Väter                      | 3.5        | 1.0       | 3.5        | 0.8       | 3.4        | 0.9       | 3.5        | 0.8       | 3.4        | 0.9       | 3.5         | 0.9       |
| <b>Item 4</b>              |            |           |            |           |            |           |            |           |            |           |             |           |
| Mütter                     | 3.0        | 1.2       | 3.3        | 1.1       | 3.2        | 1.2       | 3.2        | 1.2       | 3.2        | 1.2       | 2.9         | 1.3       |
| Väter                      | 3.0        | 1.1       | 3.2        | 1.1       | 3.2        | 1.1       | 3.3        | 1.1       | 3.1        | 1.2       | 3.3         | 1.2       |
| <b>Item 5</b>              |            |           |            |           |            |           |            |           |            |           |             |           |
| Mütter                     | 2.7        | 1.2       | 2.9        | 1.1       | 2.9        | 1.1       | 2.9        | 1.2       | 2.9        | 1.2       | 2.1         | 1.3       |
| Väter                      | 3.0        | 1.1       | 3.0        | 1.1       | 3.0        | 1.0       | 3.1        | 1.2       | 3.0        | 1.2       | 3.1         | 1.3       |
| <b>Item 6</b>              |            |           |            |           |            |           |            |           |            |           |             |           |
| Mütter                     | 2.7        | 1.4       | 2.9        | 1.3       | 2.8        | 1.1       | 2.8        | 1.4       | 2.8        | 1.3       | 2.1         | 1.4       |
| Väter                      | 2.8        | 1.3       | 2.9        | 1.2       | 3.0        | 1.3       | 2.9        | 1.3       | 2.9        | 1.2       | 3.0         | 1.5       |
| <b>Item 7</b>              |            |           |            |           |            |           |            |           |            |           |             |           |
| Mütter                     | 3.6        | 1.1       | 3.6        | 1.0       | 3.5        | 1.1       | 3.5        | 1.1       | 3.6        | 1.1       | 3.1         | 1.2       |
| Väter                      | 3.6        | 1.1       | 3.6        | 1.0       | 3.6        | 1.0       | 3.7        | 1.0       | 3.6        | 1.1       | 3.7         | 1.1       |
| <b>Gesamt</b>              |            |           |            |           |            |           |            |           |            |           |             |           |
| Mütter                     | 22.8       | 5.3       | 23.5       | 5.2       | 23.2       | 5.2       | 23.3       | 5.5       | 23.3       | 5.9       | 20.3        | 5.8       |
| Väter                      | 23.3       | 4.9       | 23.3       | 5.0       | 23.7       | 5.2       | 24.0       | 5.3       | 23.4       | 5.5       | 24.0        | 5.7       |
| t-Wert                     | 1.02       |           | 0.4        |           | 1.0        |           | 1.12       |           | 0.2        |           | 6.34        |           |
| <i>p</i>                   | .311       |           | .685       |           | .322       |           | .262       |           | .965       |           | < .001      |           |
