# Supplementary material for: Längsschnittliche psychometrische Analysen des Fragebogens zur Beziehungszufriedenheit – Kurzform (FBZ-K)
Source: Atypon-hosted journal article supplement (doi:10.1026/0012-1924/a000312), 2023-01-16
Supplement: 0012-1924_a000312_esm5.pdf [file 0012-1924_a000312_esm5.pdf]

**ESM Tabelle E5.** FBZ-K: Ergebnisse der konfirmatorischen Faktorenanalysen: Fit-Indizes und Ladungen für Kita-Studie und ZF-Studie Prä und FU10 (Mütter, Väter)

| Stichprobe                   |                                          | Chi <sup>2</sup> of model fit                                                   | RMSEA | CFI  | TLI  | SRMR | Korrelationen                                                            | Faktorladungen                                                                                 |
|------------------------------|------------------------------------------|---------------------------------------------------------------------------------|-------|------|------|------|--------------------------------------------------------------------------|------------------------------------------------------------------------------------------------|
| Kita-Studie Mütter (N = 417) | 1-Faktor-Lösung                          | Chi <sup>2</sup> = 145.72<br>df = 14<br>p < .001<br>Chi <sup>2</sup> /df = 10.4 | .15   | .87  | .81  | .07  | keine                                                                    | Item 1 .45<br>Item 2 .58<br>Item 3 .59<br>Item 4 .81<br>Item 5 .74<br>Item 6 .70<br>Item 7 .66 |
|                              | 1-Faktor-Lösung (mit vier Korrelationen) | Chi <sup>2</sup> = 16.28<br>df = 10<br>p = .092<br>Chi <sup>2</sup> /df = 1.6   | .04   | .99  | .99  | .02  | r (i4+i5) = .52<br>r (i4+i6) = .31<br>r (i1+i2) = .26<br>r (i5+i6) = .38 | Item 1 .49<br>Item 2 .64<br>Item 3 .69<br>Item 4 .65<br>Item 5 .54<br>Item 6 .58<br>Item 7 .73 |
| ZF Prä Mütter (N = 233)      | 1-Faktor-Lösung                          | Chi <sup>2</sup> = 56.41<br>df = 14<br>p < .001<br>Chi <sup>2</sup> /df = 4.0   | .11   | .91  | .87  | .05  | keine                                                                    | Item 1 .36<br>Item 2 .64<br>Item 3 .55<br>Item 4 .71<br>Item 5 .62<br>Item 6 .59<br>Item 7 .78 |
|                              | 1-Faktor-Lösung (mit vier Korrelationen) | Chi <sup>2</sup> = 13.40<br>df = 10<br>p = .202<br>Chi <sup>2</sup> /df = 1.3   | .04   | .99  | .99  | .02  | r (i4+i5) = .45<br>r (i4+i6) = .27<br>r (i1+i2) = .15<br>r (i5+i6) = .29 | Item 1 .34<br>Item 2 .64<br>Item 3 .57<br>Item 4 .67<br>Item 5 .57<br>Item 6 .51<br>Item 7 .83 |
| ZF Prä Väter (N = 201)       | 1-Faktor-Lösung                          | Chi <sup>2</sup> = 92.0<br>df = 14<br>p < .001<br>Chi <sup>2</sup> /df = 6.6    | .17   | .83  | .75  | .07  | Keine                                                                    | Item 1 .44<br>Item 2 .66<br>Item 3 .60<br>Item 4 .69<br>Item 5 .70<br>Item 6 .63<br>Item 7 .71 |
|                              | 1-Faktor-Lösung (mit vier Korrelationen) | Chi <sup>2</sup> = 9.86<br>df = 10<br>p = .453<br>Chi <sup>2</sup> /df = 0.9    | .00   | 1.00 | 1.00 | .03  | r (i4+i5) = .52<br>r (i4+i6) = .34<br>r (i1+i2) = .24<br>r (i5+i6) = .42 | Item 1 .40<br>Item 2 .72<br>Item 3 .69<br>Item 4 .51<br>Item 5 .52<br>Item 6 .48<br>Item 7 .80 |
| ZF FU10 Mütter (N = 213)     | 1-Faktor-Lösung                          | Chi <sup>2</sup> = 41.28<br>df = 14<br>p < .001<br>Chi <sup>2</sup> /df = 2.9   | .10   | .93  | .90  | .05  | keine                                                                    | Item 1 .52<br>Item 2 .58<br>Item 3 .50<br>Item 4 .76<br>Item 5 .68<br>Item 6 .55<br>Item 7 .75 |
|                              | 1-Faktor-Lösung (mit vier Korrelationen) | Chi <sup>2</sup> = 5.75<br>df = 10<br>p = .453<br>Chi <sup>2</sup> /df = 0.6    | .00   | 1.00 | 1.00 | .02  | r (i4+i5) = .40<br>r (i4+i6) = .27<br>r (i1+i2) = .17<br>r (i5+i6) = .21 | Item 1 .53<br>Item 2 .58<br>Item 3 .54<br>Item 4 .63<br>Item 5 .55<br>Item 6 .45<br>Item 7 .85 |

|                               |                                                    |                                                                                   |     |      |      |     |                                                                          |                                                                                                |
|-------------------------------|----------------------------------------------------|-----------------------------------------------------------------------------------|-----|------|------|-----|--------------------------------------------------------------------------|------------------------------------------------------------------------------------------------|
|                               | 1-Faktor-<br>Lösung                                | Chi <sup>2</sup> =<br>132.37<br>df = 14<br>p < .001<br>Chi <sup>2</sup> /df = 9.5 | .22 | .81  | .72  | .09 | Keine                                                                    | Item 1 .51<br>Item 2 .64<br>Item 3 .69<br>Item 4 .77<br>Item 5 .82<br>Item 6 .74<br>Item 7 .71 |
| ZF FU10<br>Väter<br>(N = 182) | 1-Faktor-<br>Lösung<br>(mit vier<br>Korrelationen) | Chi <sup>2</sup> = 10.79<br>df = 14<br>p < .001<br>Chi <sup>2</sup> /df = 1.1     | .02 | 1.00 | 1.00 | .02 | r (i4+i5) = .58<br>r (i4+i6) = .38<br>r (i1+i2) = .50<br>r (i5+i6) = .44 | Item 1 .53<br>Item 2 .67<br>Item 3 .78<br>Item 4 .60<br>Item 5 .65<br>Item 6 .62<br>Item 7 .81 |
