# Supplementary material for: Längsschnittliche psychometrische Analysen des Fragebogens zur Beziehungszufriedenheit – Kurzform (FBZ-K)
Source: Atypon-hosted journal article supplement (doi:10.1026/0012-1924/a000312), 2023-01-16
Supplement: 0012-1924_a000312_esm6.pdf [file 0012-1924_a000312_esm6.pdf]

**ESM Tabelle E6.** FBZ-K: Zusammenhänge mit soziodemographischen Variablen für die Kita-Studie und die ZF-Studie

|                               | <b>Kita<br/>Stu-<br/>die</b> | <b>ZF-Prä</b> |          | <b>ZF-FU1</b> |          | <b>ZF-FU2</b> |          | <b>ZG-FU3</b> |          | <b>ZF-FU4</b> |          | <b>ZF-FU10</b> |          |
|-------------------------------|------------------------------|---------------|----------|---------------|----------|---------------|----------|---------------|----------|---------------|----------|----------------|----------|
|                               | <b>M</b>                     | <b>M</b>      | <b>V</b> | <b>M</b>       | <b>V</b> |
| M: Alter prä                  | .00                          | -.17*         | -.08     | -.09          | -.14     | -.23*         | -.17*    | -.15*         | -.20**   | -.02          | -.12     | -.05           | -.15*    |
| V: Alter prä                  |                              | -.15*         | -.12     | -.01          | .01      | -.12          | -.04     | -.08          | -.07     | -.04          | -.05     | .02            | -.12     |
| K: Alter prä                  | .06                          | -.03          | .04      | -.06          | -.02     | -.06          | .03      | -.09          | .10      | -.06          | -.02     | .04            | .09      |
| K: Geschlecht                 | .03                          | -.03          | .04      | -.06          | -.02     | -.06          | .03      | -.09          | .10      | -.06          | -.02     | .08            | .09      |
| K: Migrations-<br>hintergrund |                              | -.05          | .03      | -.04          | -.01     | -.06          | .01      | -.14*         | -.05     | -.06          | -.02     | .01            | -.06     |
| M: Schule prä                 | -.06                         | .06           | .10      | -.06          | -.01     | -.12          | -.08     | .05           | -.07     | .15*          | .12      | .01            | .08      |
| V: Schule prä                 |                              | .01           | -.01     | -.03          | -.14*    | -.06          | -.14     | -.08          | -.16*    | .09           | -.08     | -.09           | -.04     |
| M: Schule FU10                |                              |               |          |               |          |               |          |               |          |               |          | .02            | .09      |
| Haushalts-<br>einkommen       | .06                          | .04           | .07      | -.01          | -.03     | -.05          | -.05     | .11           | -.00     | .09           | -.02     | .08            | -.02     |
| Anzahl der<br>Kinder          | -.04                         |               |          |               |          |               |          |               |          |               |          |                |          |
| Dauer der<br>Partnerschaft    | -.01                         |               |          |               |          |               |          |               |          |               |          |                |          |

Anmerkungen: \*  $p \leq .05$ , \*\*  $p \leq .01$ ; M = Mütter, V = Väter.
