# Supplementary material for: Längsschnittliche psychometrische Analysen des Fragebogens zur Beziehungszufriedenheit – Kurzform (FBZ-K)
Source: Atypon-hosted journal article supplement (doi:10.1026/0012-1924/a000312), 2023-01-16
Supplement: 0012-1924_a000312_esm7.pdf [file 0012-1924_a000312_esm7.pdf]

**ESM Tabelle E7.** Konstruktvalidität: Zusammenhänge zwischen FBZ-K und DASS, EFB, FLZ, EKS und CBCL, Mutter und Väter über sechs Messzeitpunkte

| FBZ-K<br>Gesamt         | Depres-<br>sion | Angst    | Stress   | DASS-<br>Gesamt | EFB-<br>Gesamt | FLZ     | EKS      | CBCL-<br>Internal | CBCL-<br>External | CBCL-<br>Gesamt |
|-------------------------|-----------------|----------|----------|-----------------|----------------|---------|----------|-------------------|-------------------|-----------------|
| <b>Mutter</b>           |                 |          |          |                 |                |         |          |                   |                   |                 |
| Prä                     | -.377***        | -.252*** | -.320*** | -.362***        | -.251***       | .441*** | -.576*** | -.223***          | -.262***          | -.256***        |
| FU1                     | -.368***        | -.360*** | -.371*** | -.402***        | -.278***       | .519*** | -.633*** | -.243***          | -.226***          | -.275***        |
| FU2                     | -.348***        | -.344*** | -.383*** | -.395***        | -.247***       | .506*** | -.652*** | -.198**           | -.089             | -.164*          |
| FU3                     | -.324***        | -.364*** | -.335*** | -.373***        | -.298***       | .465*** | -.630*** | -.301***          | -.260***          | -.318***        |
| FU4                     | -.458***        | -.457*** | -.427*** | -.488***        | -.327***       | .505*** | -.672*** | -.298***          | -.208**           | -.292***        |
| FU10                    | -.185**         | -.130    | -.196**  | -.191**         | -.193**        | .358*** | -.471*** | -.116             | -.106             | -.151           |
| <b>Mittel-<br/>wert</b> | -.343           | -.318    | -.339    | -.369           | -.266          | .466    | -.606    | -.230             | -.192             | -.241           |
| <b>Vater</b>            |                 |          |          |                 |                |         |          |                   |                   |                 |
| Prä                     | -.381***        | -.270*** | -.325*** | -.364***        | -.235***       | .435*** | -.533*** | -.262***          | -.227***          | -.257***        |
| FU1                     | -.402***        | -.354*** | -.452*** | -.455***        | -.265***       | .558*** | -.534*** | -.312***          | -.264***          | -.324***        |
| FU2                     | -.257***        | -.173*   | -.285*** | -.276***        | -.256***       | .515*** | -.589*** | -.271***          | -.305***          | -.279***        |
| FU3                     | -.395***        | -.263*** | -.369*** | -.396***        | -.250***       | .570*** | -.575*** | -.216**           | -.285***          | -.293***        |
| FU4                     | -.469***        | -.291*** | -.489*** | -.488***        | -.282***       | .599*** | -.669*** | -.359***          | -.251***          | -.353***        |
| FU10                    | -.268***        | -.231*** | -.259*** | -.276***        | -.164*         | .503*** | -.542*** | -.004             | .019              | -.028           |
| <b>Mittel-<br/>wert</b> | -.362           | -.264    | -.363    | -.376           | -.242          | .530    | -.574    | -.237             | -.219             | -.256           |

*Anmerkungen.* DASS: Depression-Angst-Stress-Fragebogen; EFB: Erziehungsfragebogen; FLZ: Fragebogen zur Lebenszufriedenheit; EKS: Erziehungskonfliktskala; \*  $p < .05$ , \*\*  $p < .01$ , \*\*\*  $p < .001$ .
