# Supplementary figures and images for: Längsschnittliche psychometrische Analysen des Fragebogens zur Beziehungszufriedenheit – Kurzform (FBZ-K)
Source: Atypon-hosted journal article supplement (doi:10.1026/0012-1924/a000312), 2023-01-16

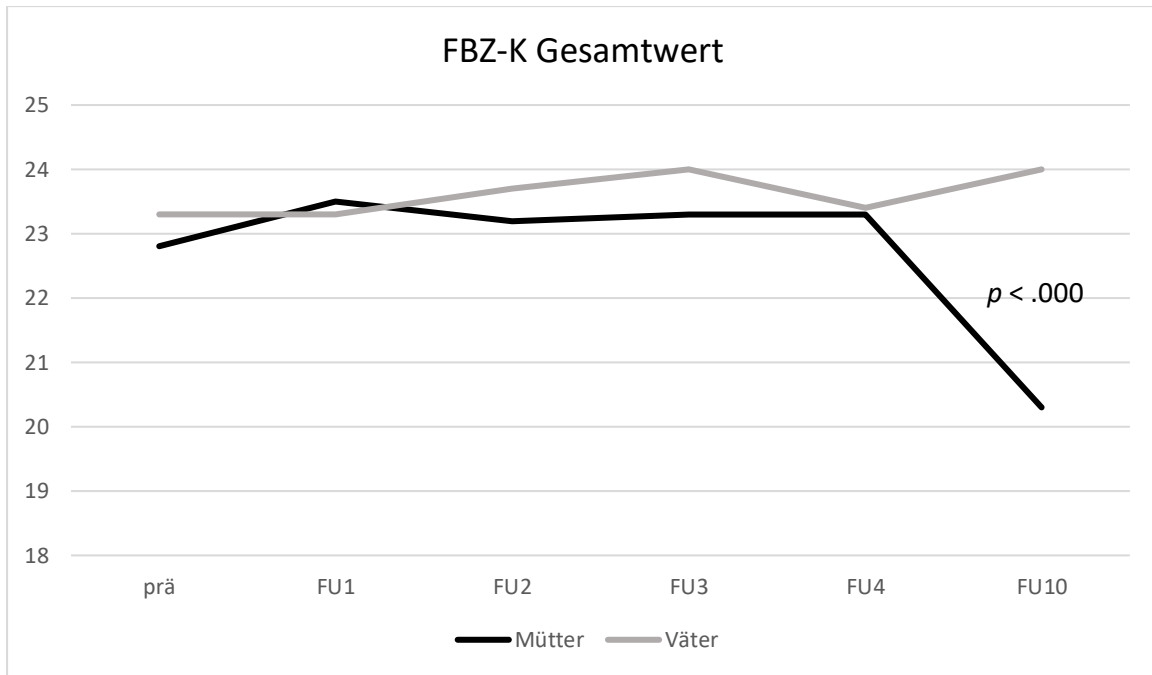

**ESM Abbildung E1.** FBZ-K: Verlauf der Mittelwerte über sechs Messzeitpunkte für Mütter und Väter.

Supplement: 0012-1924_a000312_esm8.pdf [file 0012-1924_a000312_esm8.pdf]
